# Supplementary material
Source: publisher figshare collection journal article supplement (https://gsajournals.figshare.com/ndownloader/files/23187050)
Supplement: Supplementary file 1 [file 23187050]

|  | **Sample Preservation** | **Tissue** | **Library Prep Kit** | **Illumina**  **Platform** | **Read**  **Length** |
| --- | --- | --- | --- | --- | --- |
| *Amphizoa* *insolens* DNA3784 | EtOH @ -20C | Muscle | Illumina TruSeq | HiSeq 2000 | 101 |
| *Bembidion* sp. nr. *transversale* DNA2544 | EtOH @ -20C | Reproductive | NEBNext DNA Ultra II | HiSeq 3000 | 151 |
| *Bembidion* sp. nr. *transversale* DNA5427 | Frozen, EtOH @ -20C | Reproductive | NEBNext DNA Ultra II | HiSeq 3000 | 151 |
| *Bembidion* sp. nr. *transversale* DNA5428 | Frozen, EtOH @ -20C | Muscle | NEBNext DNA Ultra II | HiSeq 3000 | 151 |
| *Bembidion* sp. nr. *transversale* DNA5433 | Frozen, EtOH @ -20C | Reproductive | NEBNext DNA Ultra II | HiSeq 3000 | 151 |
| *Bembidion* *lividulum* DNA4161 | EtOH @ -20C | Whole body | NEBNext DNA Ultra II | HiSeq 2000 | 101 |
| *Chlaenius sericeus* DNA4821 | EtOH @ -20C | Muscle | NEBNext DNA Ultra II | HiSeq 3000 | 151 |
| *Chlaenius* *sericeus* JMP068 | Frozen, EtOH @ -20C | Muscle | NEBNext DNA Ultra II | HiSeq 3000 | 151 |
| *Chlaenius* *sericeus* JMP069 | Frozen, EtOH @ -20C | Muscle | NEBNext DNA Ultra II | HiSeq 3000 | 151 |
| *Chlaenius* *sericeus* JMP070 | Frozen, EtOH @ -20C | Muscle | NEBNext DNA Ultra II | HiSeq 3000 | 151 |
| *Chlaenius* *sericeus* JMP071 | Frozen, EtOH @ -20C | Muscle | NEBNext DNA Ultra II | HiSeq 3000 | 151 |
| *Lionepha* *tuulukwa* DNA3782 | EtOH @ -20C | Muscle | Illumina TruSeq | HiSeq 2000 | 101 |
| *Lionepha* *tuulukwa* DNA5435a | Frozen, EtOH @ -20C | Reproductive | NEBNext DNA Ultra II | HiSeq 3000 | 151 |
| *Lionepha* *tuulukwa* DNA5436a | Frozen, EtOH @ -20C | Muscle | NEBNext DNA Ultra II | HiSeq 3000 | 151 |
| *Omoglymmius* *hamatus* DNA3783 | EtOH @ -20C | Muscle | Illumina TruSeq | HiSeq 2000 | 101 |
| *Pterostichus* *melanarius* DNA3787 | EtOH @ -20C | Muscle | Illumina TruSeq | HiSeq 2000 | 101 |
| *Pterostichus* *melanarius* JMP059 | Frozen, EtOH @ -20C | Muscle | NEBNext DNA Ultra II | HiSeq 3000 | 151 |
| *Pterostichus* *melanarius* JMP060 | Frozen, EtOH @ -20C | Muscle | NEBNext DNA Ultra II | HiSeq 3000 | 151 |
| *Pterostichus* *melanarius* JMP061 | Frozen, EtOH @ -20C | Muscle | NEBNext DNA Ultra II | HiSeq 3000 | 151 |
| *Pterostichus* *melanarius* JMP062 | Frozen, EtOH @ -20C | Muscle | NEBNext DNA Ultra II | HiSeq 3000 | 151 |
| *Trachypachus* *gibbsii* DNA3786 | EtOH @ -20C | Muscle | Illumina TruSeq | HiSeq 2000 | 101 |

Table S5. Additional details for methods used on genomic sequencing specimens.

a. Samples made with DNA extracted from different tissues of the same individual.
